# Supplementary material for: The key constituents underlying the combined toxicity of eight cosmetic contaminants towards Vibrio qinghaiensis
Source: Royal Society of Chemistry journal article supplement (doi:10.1039/d3em00269a), 2023-01-01
Supplement: d3em00269a1.pdf [file d3em00269a1.pdf]

## Appendix A: Supplementary Information

### **The Key Constituents Underlying the Combined Toxicity of Eight Cosmetic Contaminants towards *Vibrio qinghaiensis***

Jian-ping Zeng <sup>a, b</sup>, Jin Zhang <sup>\*a, b</sup>, Na-na Zhou <sup>a, b</sup>, Hui-yan Shen <sup>a, b</sup> and Gui-yun Hong <sup>a, b</sup>

<sup>a</sup> *Key Laboratory of Water Pollution Control and Wastewater Resource of Anhui province, Hefei 230601, P. R. China.*

<sup>b</sup> *College of Environment and Energy Engineering, Anhui Jianzhu University, Hefei 230601, P. R. China. E-mail: ginnzy@163.com; Tel: (86) -180-1958-0589*

## Contents

(One Table and Three Figures)

Table S1

Fig. S1

Fig. S2

Table S1 CRCs fitting functions (Weibull,  $W$ ), parameters, statistics and  $EC_{50}$  values for Q67 by ten mixture rays

Fig. S1 The fitted CRCs of eight cosmetic pollutants on Q67

Fig. S2 The concentration-response relationship of ten rays in the mixture system towards Q67 in five exposure times of 0.25, 2, 4, and 12h

Table S1 CRCs fitting functions (Weibull,  $W$ ), parameters, statistics and  $EC_{50}$  values for Q67 by ten mixture rays

| Rays | Time(h) | Function | $\alpha$ | $\beta$ | $RMSE^a$ | $R^b$  | $EC_{50}(\text{mol/L})$ | $pEC_{50}$ |
|------|---------|----------|----------|---------|----------|--------|-------------------------|------------|
| R1   | 0.25    | $W$      | 6.38     | 2.04    | 0.041    | 0.9919 | $4.93 \times 10^{-4}$   | 3.31       |
|      | 2       | $W$      | 6.49     | 2.13    | 0.044    | 0.9903 | $6.04 \times 10^{-4}$   | 3.22       |
|      | 4       | $W$      | 7.08     | 2.43    | 0.039    | 0.9911 | $8.62 \times 10^{-4}$   | 3.06       |
|      | 8       | $W$      | 10.07    | 3.59    | 0.030    | 0.9939 | $1.24 \times 10^{-3}$   | 2.91       |
|      | 12      | $W$      | 19.58    | 7.20    | 0.057    | 0.9816 | $1.70 \times 10^{-3}$   | 2.77       |
| R2   | 0.25    | $W$      | 6.62     | 2.33    | 0.037    | 0.9920 | $1.00 \times 10^{-3}$   | 3.00       |
|      | 2       | $W$      | 7.66     | 2.76    | 0.040    | 0.9905 | $1.24 \times 10^{-3}$   | 2.91       |
|      | 4       | $W$      | 11.01    | 4.05    | 0.060    | 0.9878 | $1.55 \times 10^{-3}$   | 2.81       |
|      | 8       | $W$      | 13.62    | 5.12    | 0.041    | 0.9883 | $1.85 \times 10^{-3}$   | 2.73       |
|      | 12      | $W$      | 19.99    | 7.75    | 0.060    | 0.9773 | $2.36 \times 10^{-3}$   | 2.63       |
| R3   | 0.25    | $W$      | 6.54     | 1.96    | 0.030    | 0.9956 | $2.99 \times 10^{-4}$   | 3.52       |
|      | 2       | $W$      | 6.42     | 1.98    | 0.025    | 0.9966 | $3.74 \times 10^{-4}$   | 3.43       |
|      | 4       | $W$      | 6.84     | 2.20    | 0.022    | 0.9972 | $5.30 \times 10^{-4}$   | 3.28       |
|      | 8       | $W$      | 9.37     | 3.13    | 0.027    | 0.9957 | $7.75 \times 10^{-4}$   | 3.11       |
|      | 12      | $W$      | 12.78    | 4.36    | 0.037    | 0.9925 | $9.65 \times 10^{-4}$   | 3.02       |
| R4   | 0.25    | $W$      | 5.62     | 1.97    | 0.040    | 0.9890 | $9.14 \times 10^{-4}$   | 3.04       |
|      | 2       | $W$      | 6.69     | 2.43    | 0.035    | 0.9917 | $1.25 \times 10^{-3}$   | 2.90       |
|      | 4       | $W$      | 8.64     | 3.24    | 0.020    | 0.9976 | $1.66 \times 10^{-3}$   | 2.78       |
|      | 8       | $W$      | 10.50    | 4.02    | 0.037    | 0.9883 | $1.98 \times 10^{-3}$   | 2.70       |
|      | 12      | $W$      | 16.10    | 6.27    | 0.052    | 0.9807 | $2.36 \times 10^{-3}$   | 2.63       |
| R5   | 0.25    | $W$      | 5.72     | 1.95    | 0.024    | 0.9961 | $7.56 \times 10^{-4}$   | 3.12       |
|      | 2       | $W$      | 6.65     | 2.29    | 0.028    | 0.9951 | $8.63 \times 10^{-4}$   | 3.06       |
|      | 4       | $W$      | 9.00     | 3.16    | 0.026    | 0.9964 | $1.09 \times 10^{-3}$   | 2.96       |
|      | 8       | $W$      | 10.71    | 3.89    | 0.033    | 0.9956 | $1.42 \times 10^{-3}$   | 2.85       |
|      | 12      | $W$      | 12.82    | 4.72    | 0.035    | 0.9931 | $1.61 \times 10^{-3}$   | 2.79       |
| R6   | 0.25    | $W$      | 6.38     | 2.13    | 0.013    | 0.9991 | $6.80 \times 10^{-4}$   | 3.17       |
|      | 2       | $W$      | 7.48     | 2.54    | 0.016    | 0.9988 | $8.14 \times 10^{-4}$   | 3.09       |
|      | 4       | $W$      | 11.37    | 3.97    | 0.053    | 0.9925 | $1.11 \times 10^{-3}$   | 2.96       |
|      | 8       | $W$      | 10.85    | 3.84    | 0.040    | 0.9943 | $1.20 \times 10^{-3}$   | 2.92       |
|      | 12      | $W$      | 14.42    | 5.25    | 0.035    | 0.9903 | $1.53 \times 10^{-3}$   | 2.82       |
| R7   | 0.25    | $W$      | 6.14     | 1.99    | 0.028    | 0.9955 | $5.38 \times 10^{-4}$   | 3.27       |
|      | 2       | $W$      | 6.88     | 2.27    | 0.035    | 0.9937 | $6.42 \times 10^{-4}$   | 3.19       |
|      | 4       | $W$      | 8.90     | 3.00    | 0.029    | 0.9970 | $8.15 \times 10^{-4}$   | 3.09       |
|      | 8       | $W$      | 10.89    | 3.77    | 0.027    | 0.9967 | $1.03 \times 10^{-3}$   | 2.99       |
|      | 12      | $W$      | 12.15    | 4.27    | 0.031    | 0.9948 | $1.17 \times 10^{-3}$   | 2.93       |
| R8   | 0.25    | $W$      | 6.09     | 2.17    | 0.018    | 0.9981 | $1.06 \times 10^{-3}$   | 2.98       |
|      | 2       | $W$      | 6.89     | 2.46    | 0.026    | 0.9962 | $1.12 \times 10^{-3}$   | 2.95       |
|      | 4       | $W$      | 8.28     | 3.02    | 0.023    | 0.9979 | $1.37 \times 10^{-3}$   | 2.86       |
|      | 8       | $W$      | 9.94     | 3.66    | 0.025    | 0.9973 | $1.53 \times 10^{-3}$   | 2.82       |
|      | 12      | $W$      | 16.54    | 6.25    | 0.053    | 0.9874 | $1.97 \times 10^{-3}$   | 2.71       |
| R9   | 0.25    | $W$      | 6.60     | 1.90    | 0.017    | 0.9985 | $2.15 \times 10^{-4}$   | 3.67       |
|      | 2       | $W$      | 7.14     | 2.08    | 0.027    | 0.9964 | $2.46 \times 10^{-4}$   | 3.61       |
|      | 4       | $W$      | 8.54     | 2.57    | 0.035    | 0.9946 | $3.42 \times 10^{-4}$   | 3.47       |
|      | 8       | $W$      | 8.63     | 2.68    | 0.024    | 0.9970 | $4.40 \times 10^{-4}$   | 3.36       |
|      | 12      | $W$      | 10.83    | 3.47    | 0.036    | 0.9935 | $5.93 \times 10^{-4}$   | 3.23       |
| R10  | 0.25    | $W$      | 6.29     | 2.08    | 0.020    | 0.9980 | $6.31 \times 10^{-4}$   | 3.20       |
|      | 2       | $W$      | 6.94     | 2.31    | 0.024    | 0.9974 | $6.87 \times 10^{-4}$   | 3.16       |
|      | 4       | $W$      | 7.77     | 2.64    | 0.037    | 0.9942 | $8.28 \times 10^{-4}$   | 3.08       |
|      | 8       | $W$      | 9.19     | 3.17    | 0.027    | 0.9974 | $9.67 \times 10^{-4}$   | 3.01       |
|      | 12      | $W$      | 14.98    | 5.32    | 0.051    | 0.9923 | $1.30 \times 10^{-3}$   | 2.88       |

<sup>a</sup>  $RMSE$  refers to root mean square error.<sup>b</sup>  $R$  refers to correlation coefficient.

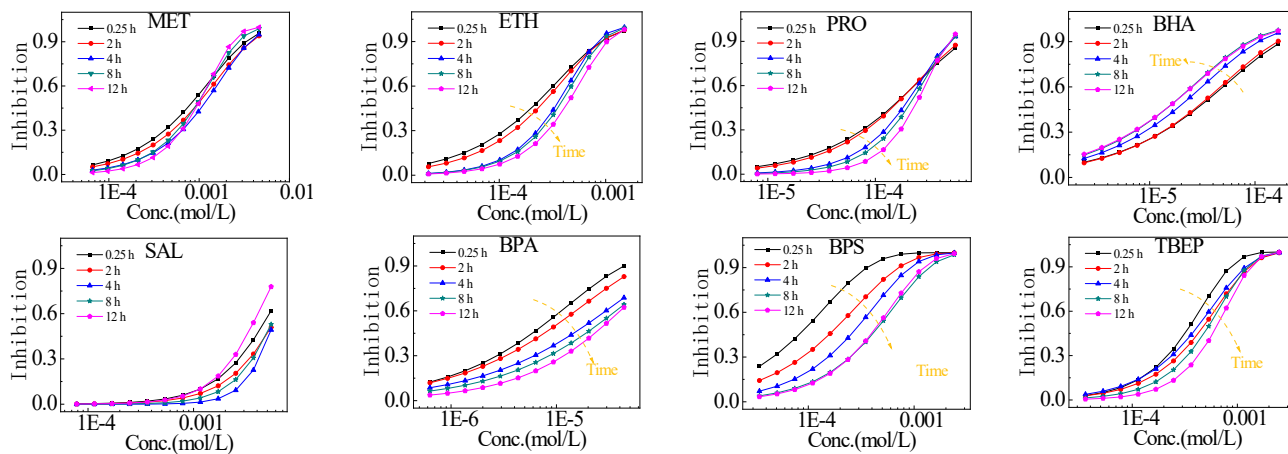

Fig. S1 The fitted CRCs of eight cosmetic pollutants on Q67

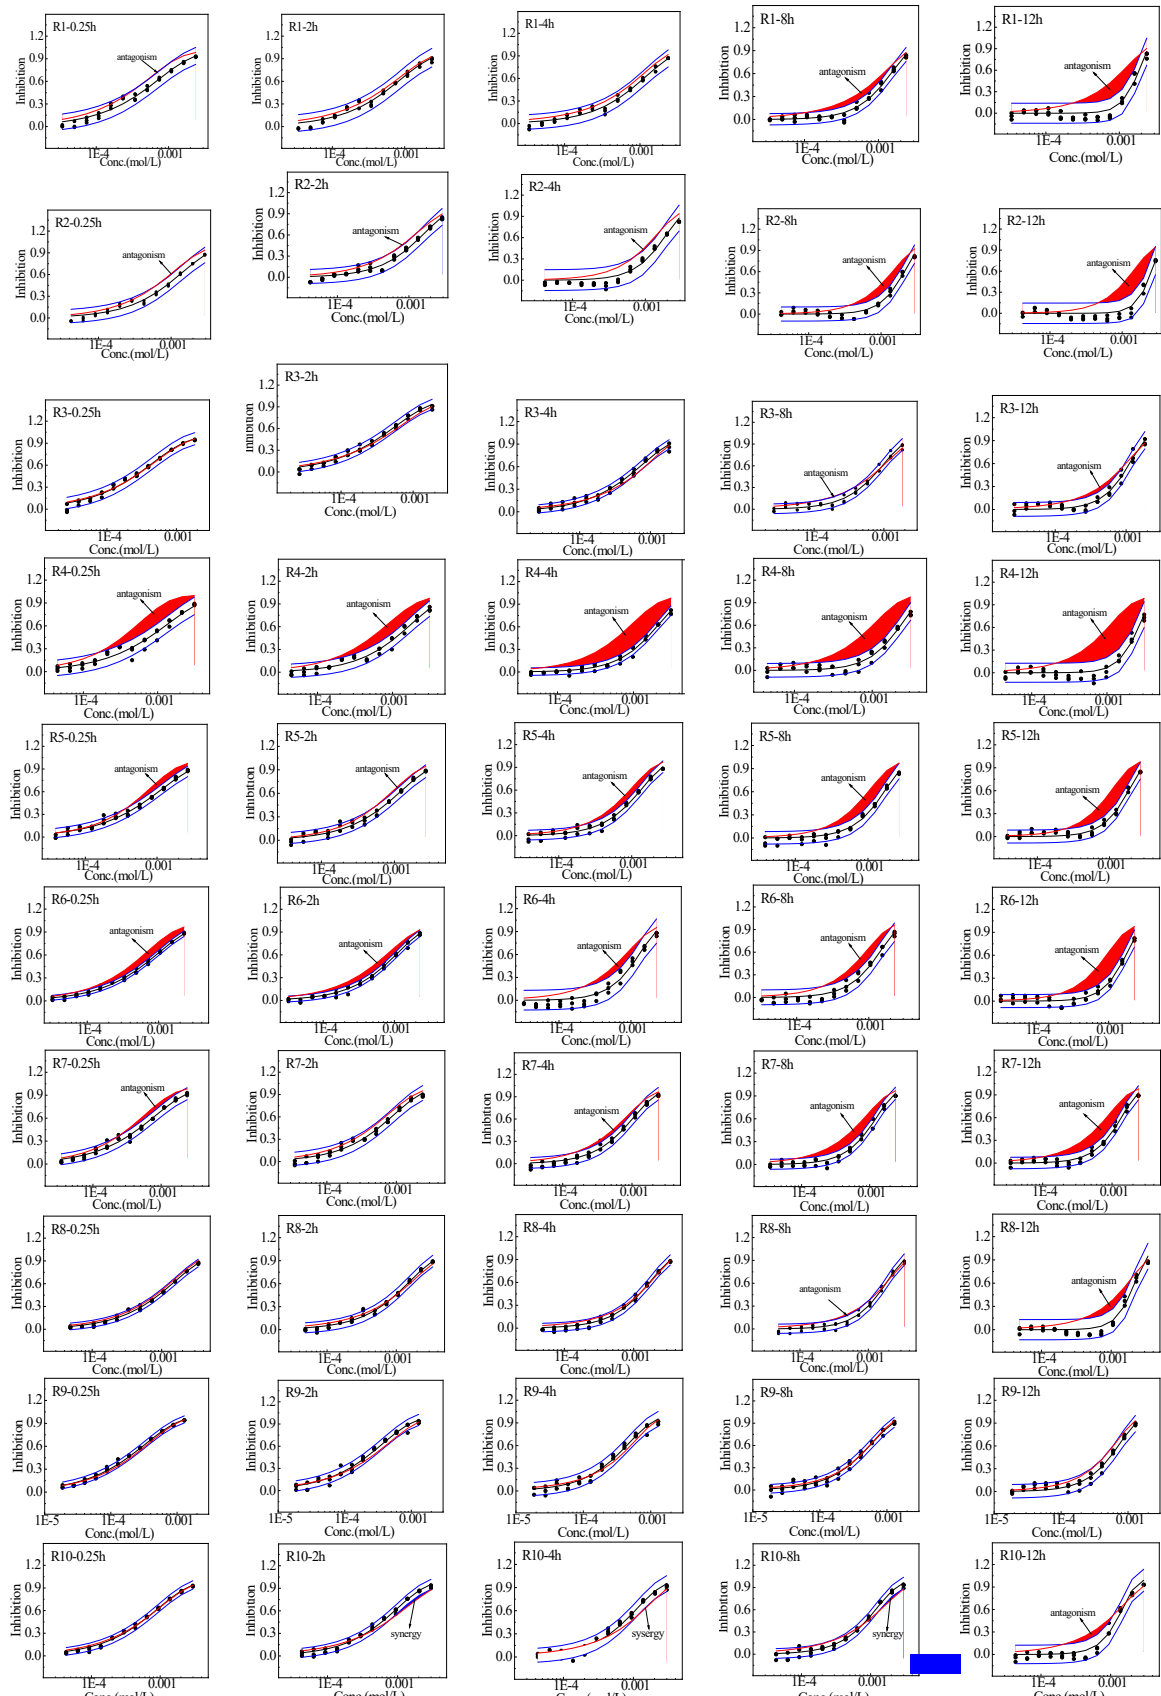

(●: observed data; —: fitted curve; —: CRCs predicted curve by CA; —: 95% confidence intervals; : synergistic region; : antagonistic region)

Fig. S2 The concentration-response relationship of ten rays in the mixture system towards Q67 in five exposure times of 0.25, 2, 4, and 12h
